# Supplementary material
Source: publisher figshare collection journal article supplement (https://rs.figshare.com/ndownloader/files/9242749)
Supplement: Supplementary file 1 [file 9242749]

**Supplementary 3D model 1.** *Diprotodon optatum* incisor (QMF3452) from the Darling Downs, Queensland, Australia. The length measured along the dorsal surface is approximately 300 mm.
